# Supplementary material for: Brimonidine–montmorillonite hybrid formulation for topical drug delivery to the eye
Source: Royal Society of Chemistry journal article supplement (doi:10.1039/d0tb01213k), 2020-01-01
Supplement: d0tb01213k1.pdf [file d0tb01213k1.pdf]

**Supplementary Materials for**  
**Brimonidine–Montmorillonite Hybrid Formulation**  
**for Topical Drug Delivery to the Eye**

Chun Gwon Park, Goeun Choi, Myung Hun Kim, Se-Na Kim, Hanna Lee, Na Kyeong Lee,  
Young Bin Choy, and Jin-Ho Choy

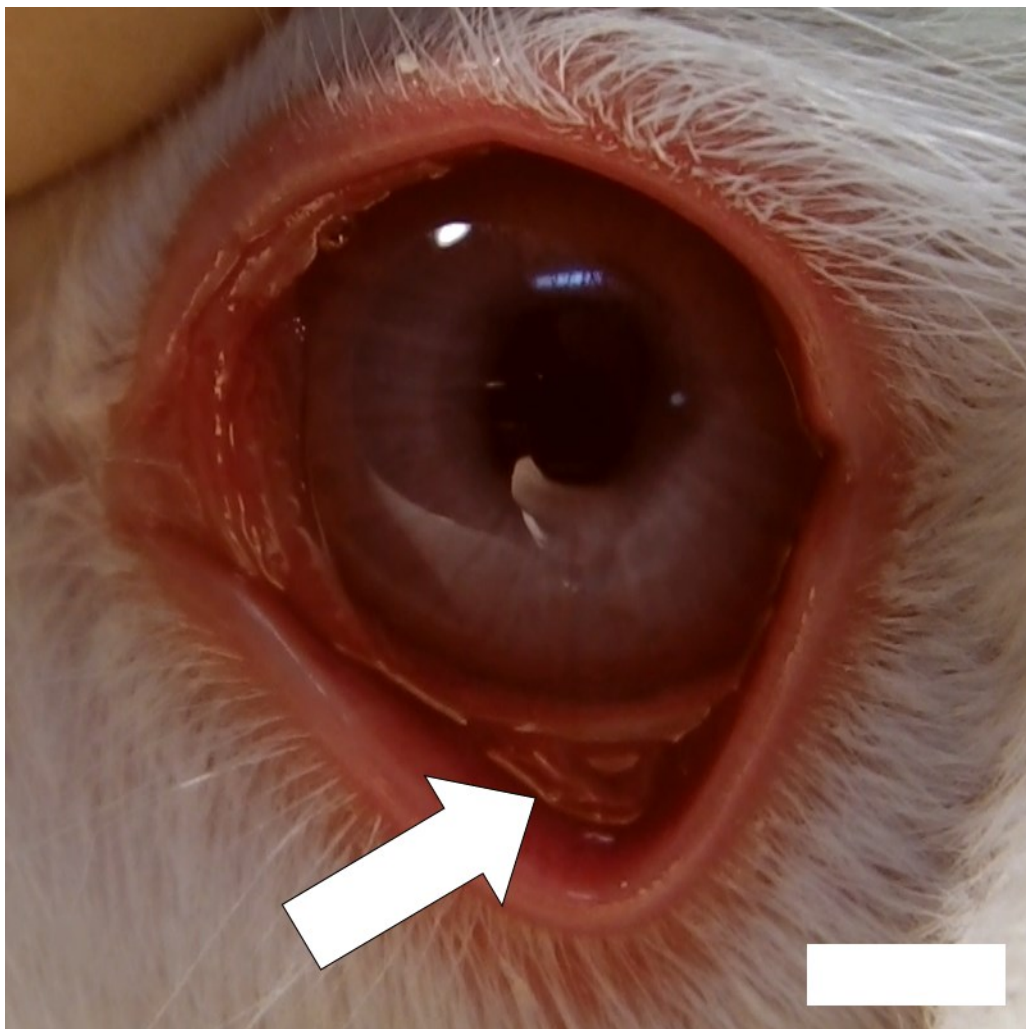

**Figure S1.** Representative image of the rabbit eye. The white arrow indicates the administration site (lower cul-de-sac) of the formulations tested in this study. Scale bar = 5 mm.
